# Supplementary material for: Preclinical anti-tumour activity of HexaBody-CD38, a next-generation CD38 antibody with superior complement-dependent cytotoxic activity
Source: PubMed Central journal article supplement — eBioMedicine. 2023 Jun 26;93:104663. doi: 10.1016/j.ebiom.2023.104663 (PMC10320249; doi:10.1016/j.ebiom.2023.104663), 2023-06-26

FIG S1

**a** HexaBody-CD38 (IgG1-3003-028-E430G)

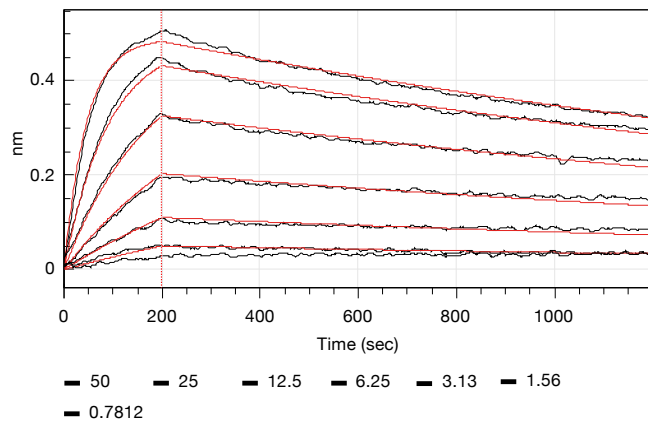

**b** daratumumab

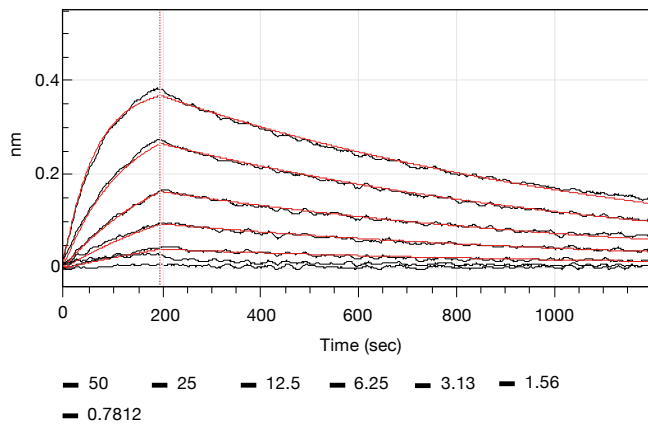

**c** isatuximab

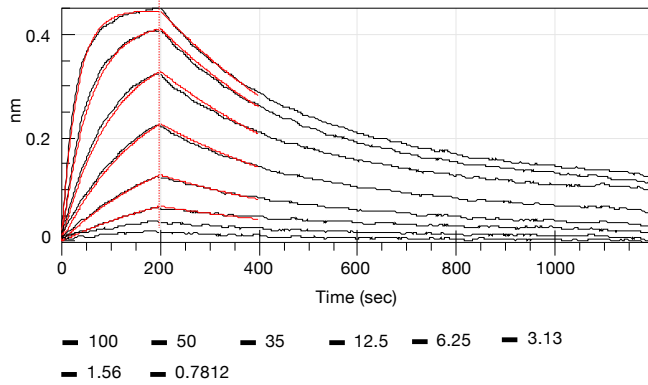

FIG S2

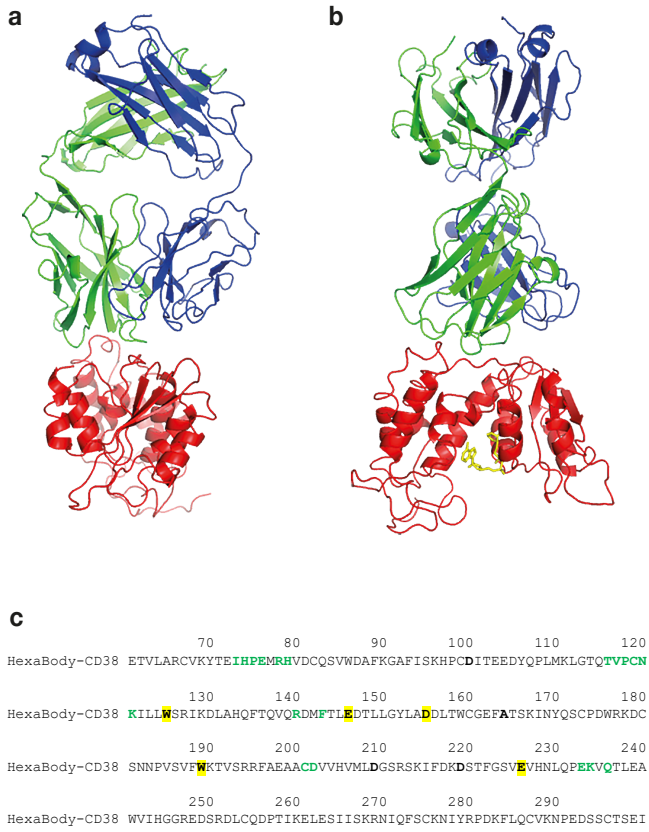

FIG S3

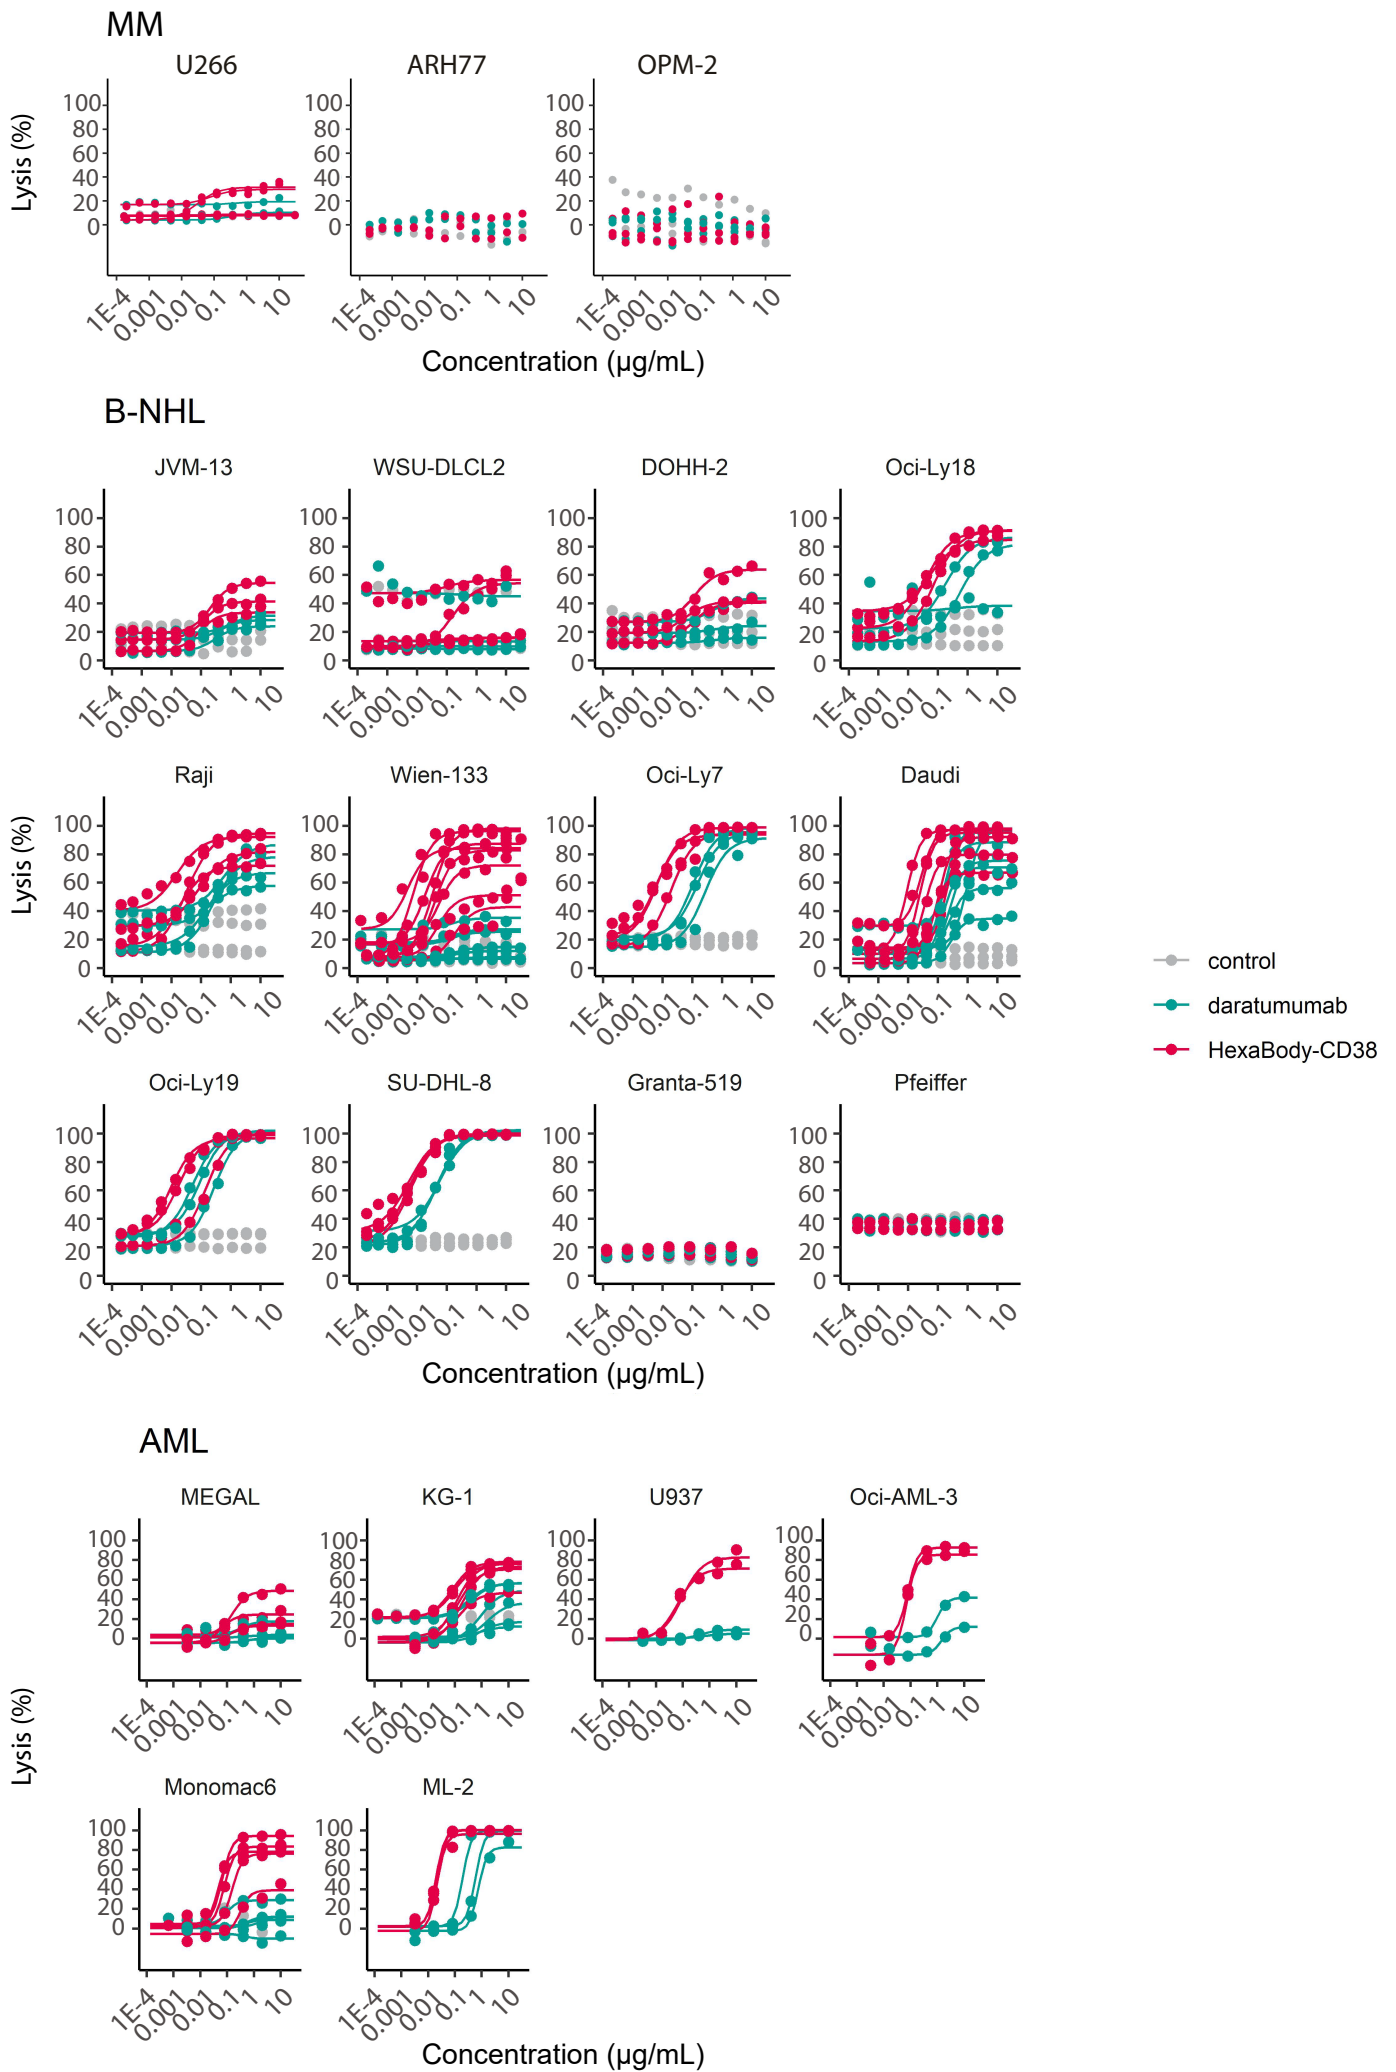

**FIG S4**

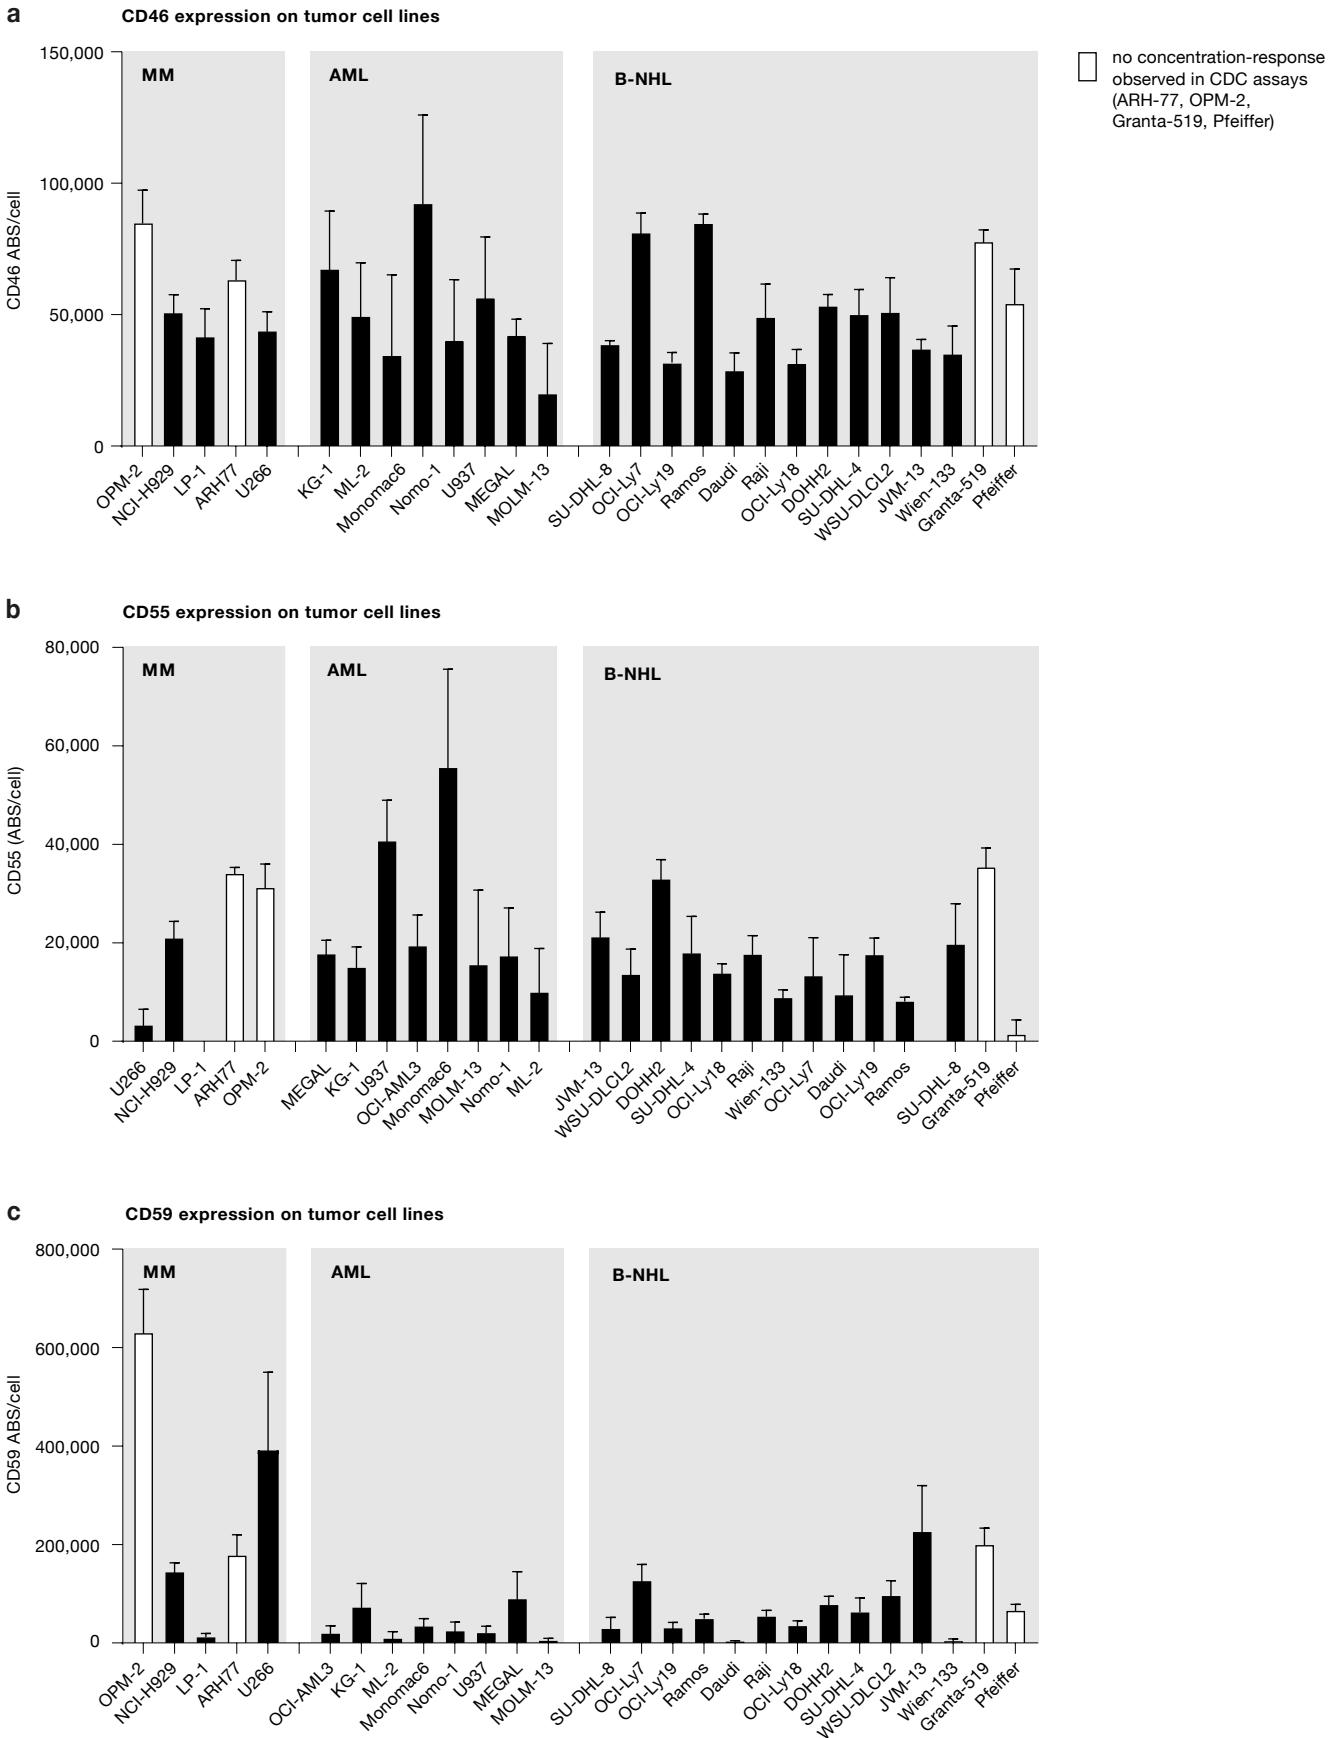

FIG S5

**a** CD46

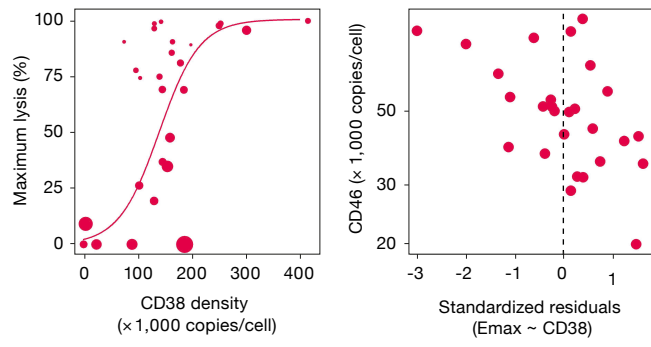

**b** CD55

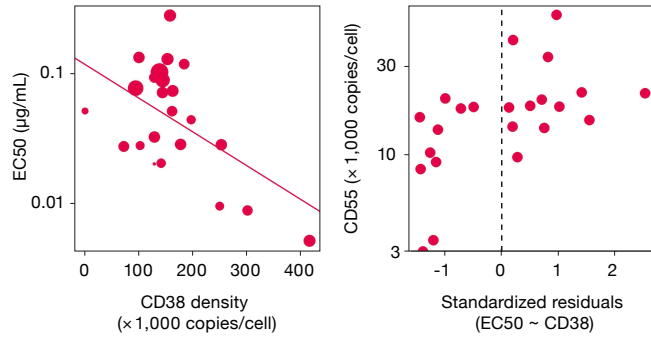

**c** CD59

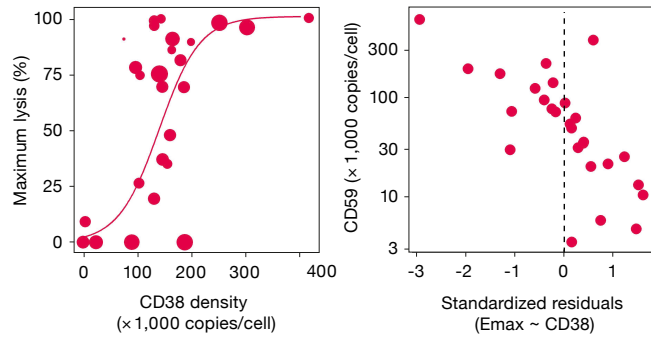

FIG S6

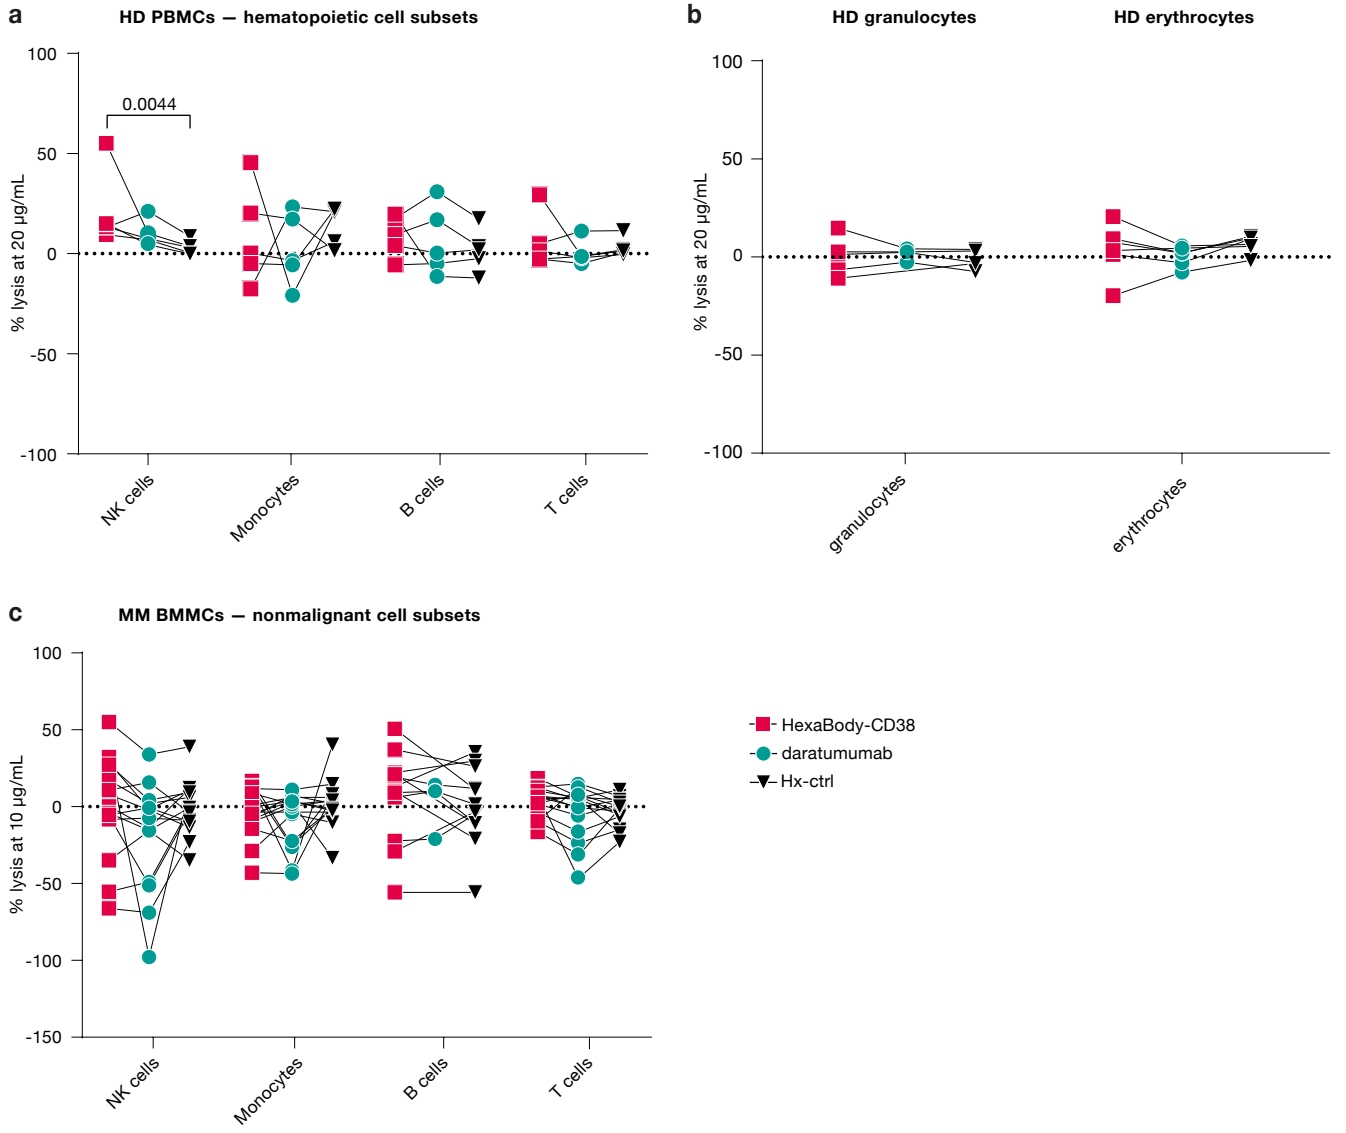

FIG S7

a ADCC

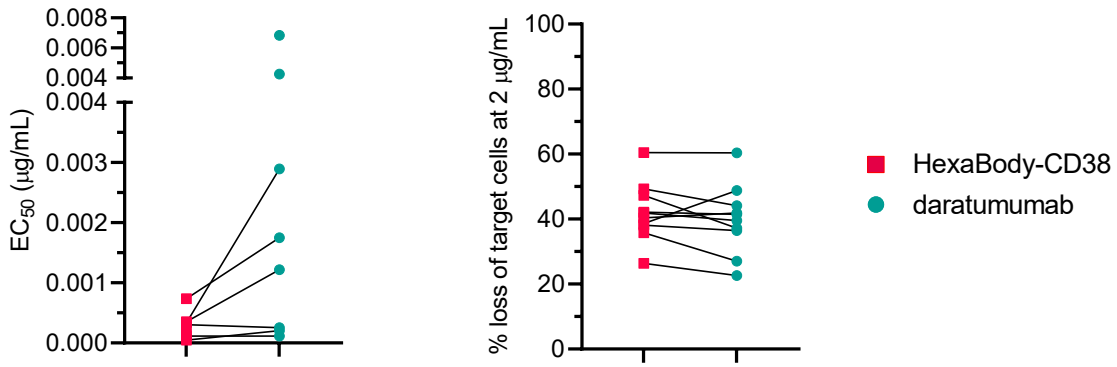

b ADCP - loss of Daudi cells

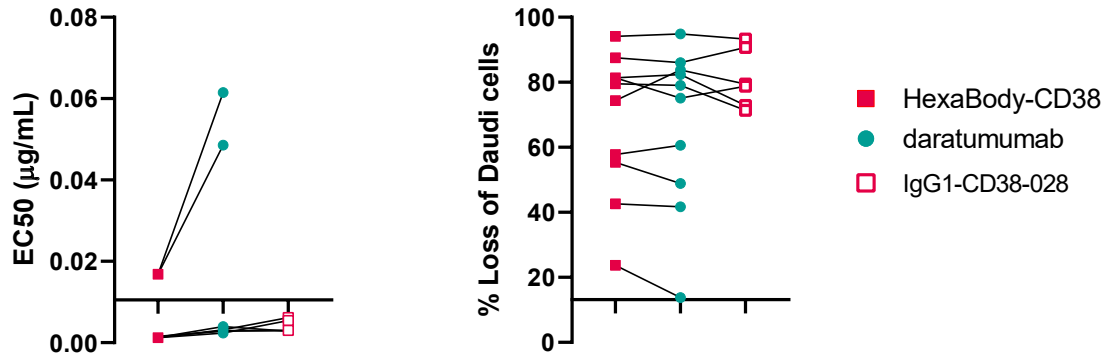

c ADCP - phagocytic activity

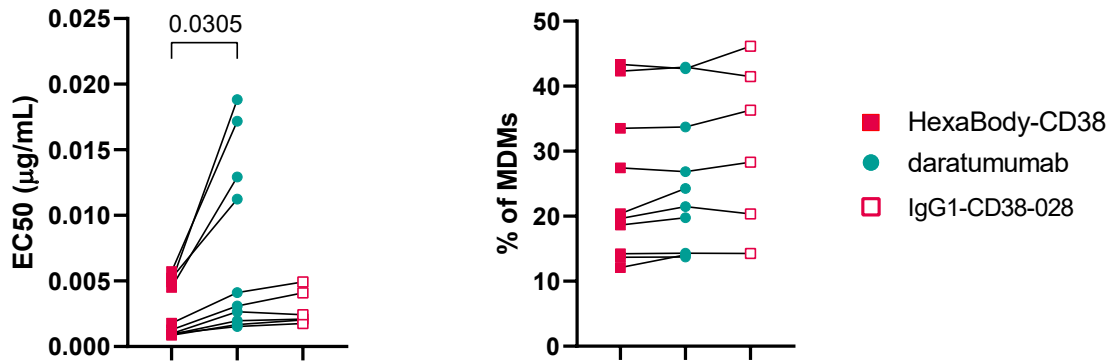

d Trogocytosis

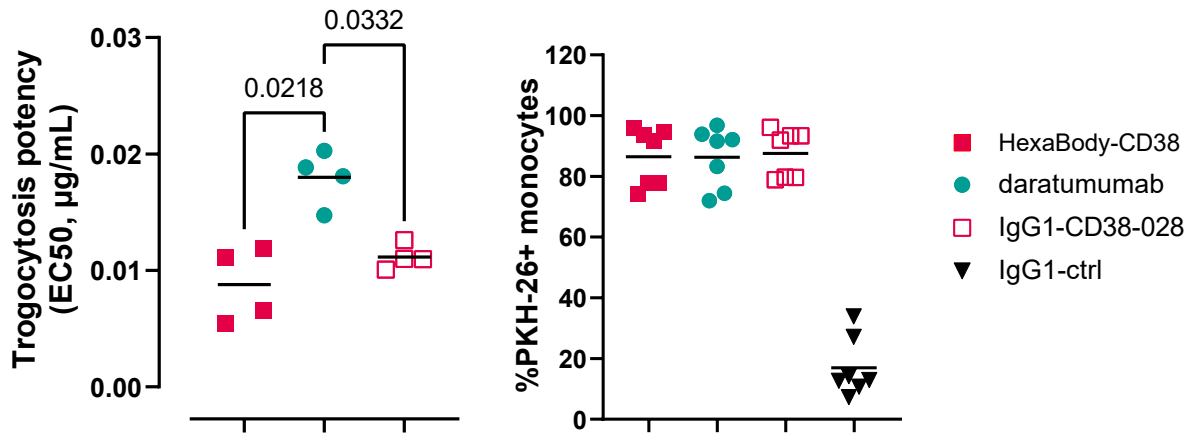

**FIG S8**

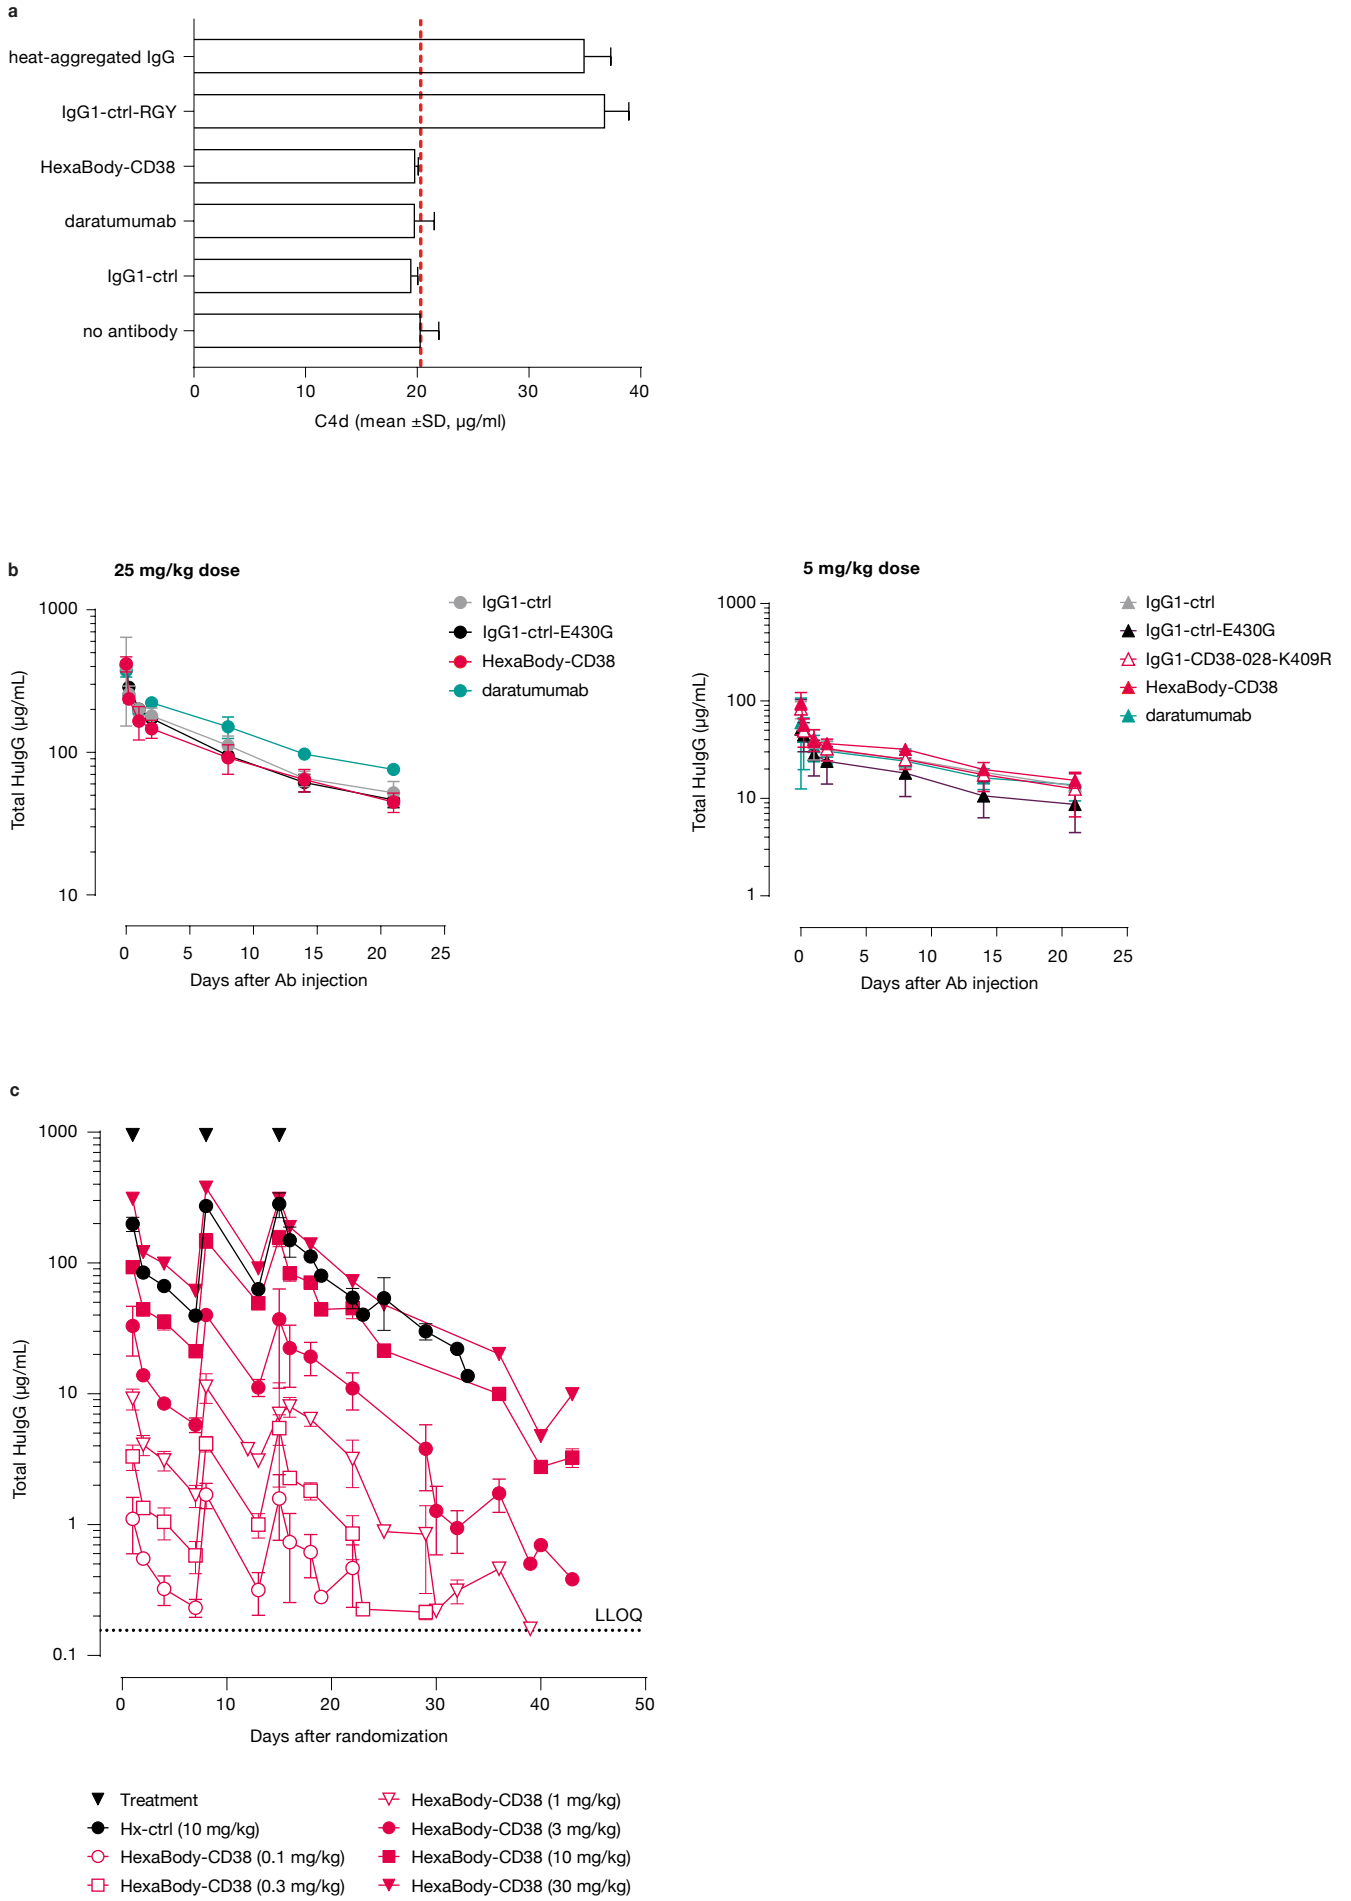



FIG S9

a

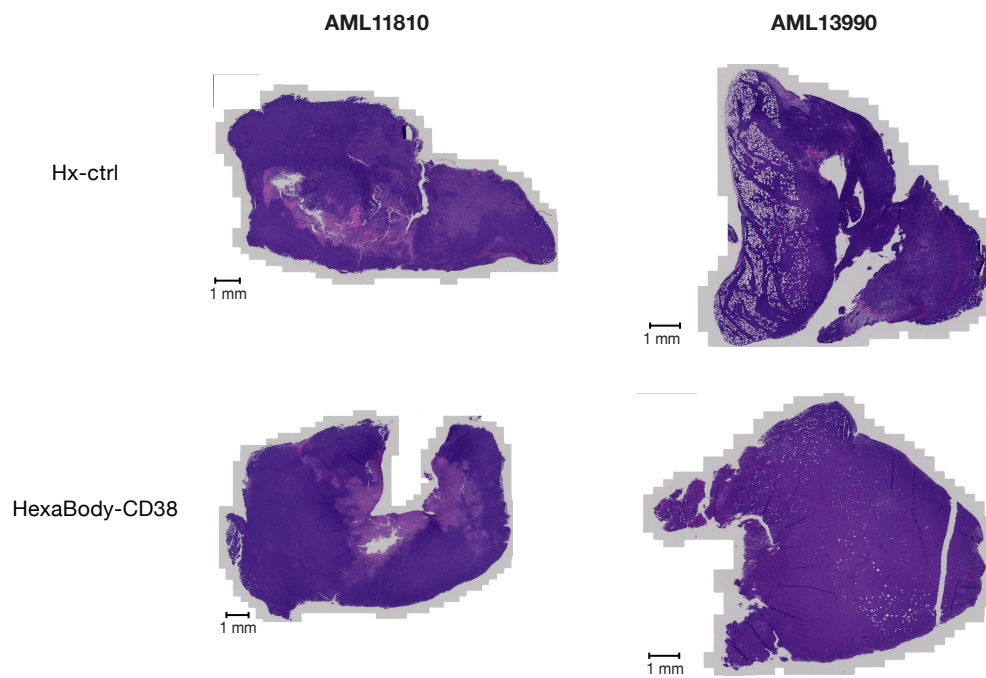

b

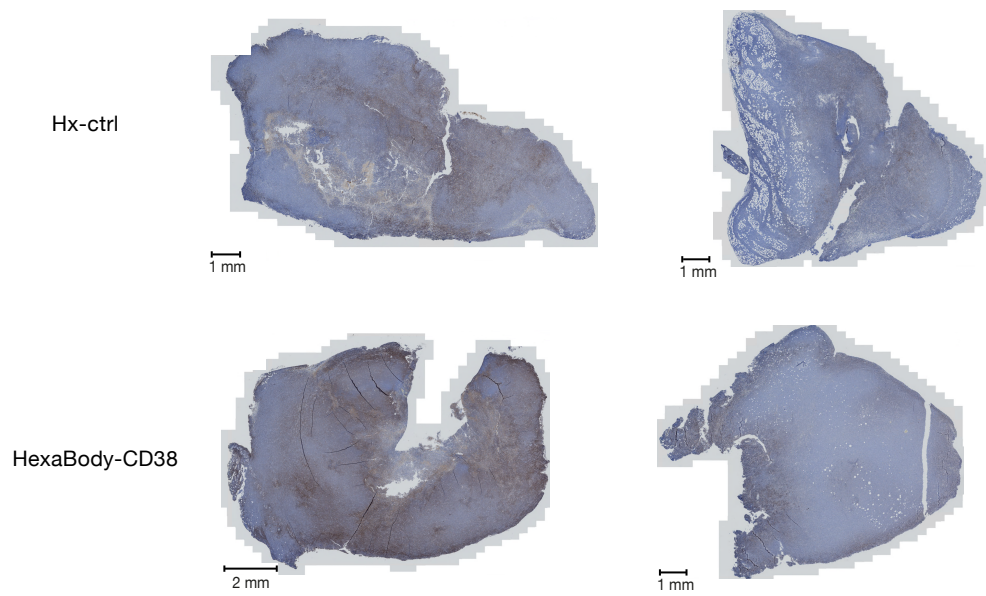

c

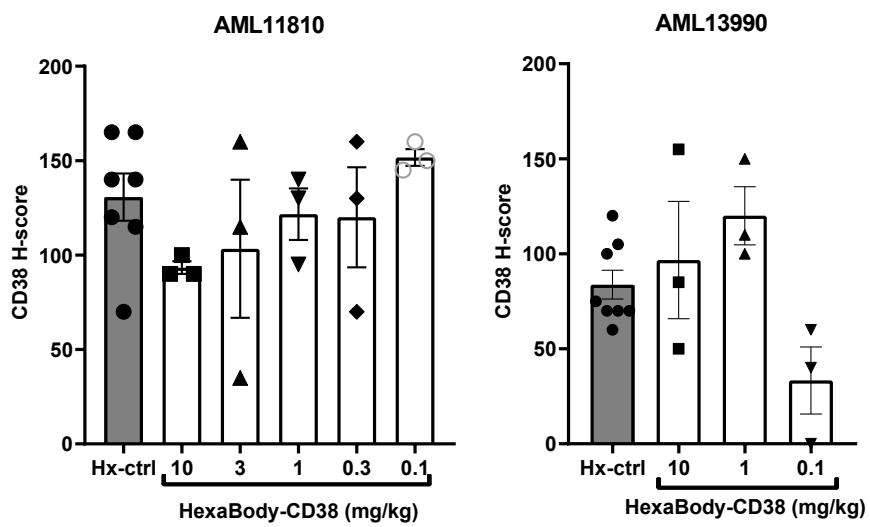

**FIG S10**

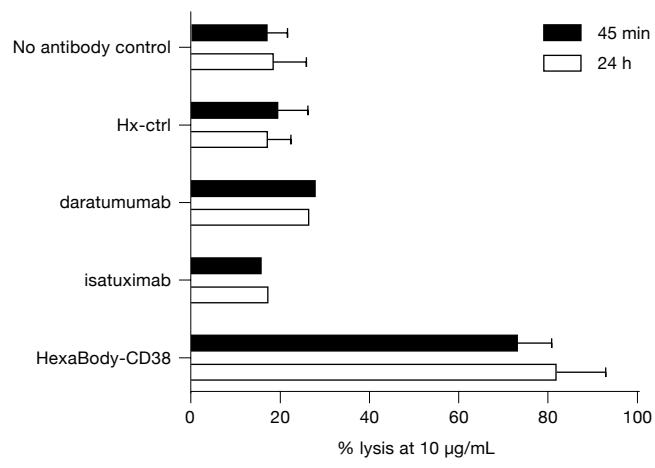

Supplement: mmc2.pdf [file mmc2.pdf]
